# Supplementary material for: SciApps: a cloud-based platform for reproducible bioinformatics workflows
Source: Oxford University Press journal article supplement (doi:10.1093/bioinformatics/bty439), 2018-05-25
Supplement: bioinformatics_34_22_3917_s2.docx [file bioinformatics_34_22_3917_s2.docx]

**Supplementary Materials for**

**SciApps: A cloud-based platform for reproducible bioinformatics workflows**

Liya Wang, Zhenyuan Lu, Peter Van Buren, and Doreen Ware

**Optimizing/modifying existing Agave Apps**

To generate the JBrowse view output, the MAKER app is customized in several places. First, the maker2jbrowse command is added to the wrapper script of MAKER app. A detailed explanation of why a wrapper script is needed for an Agave app is provided in Agave’s CyVerse SDK (https://cyverse.github.io/cyverse-sdk/). This command prepares the MAKER output as a folder with multiple sub-folders and hundreds of small files for JBrowse. Second, the folder is compressed with gzip to bypass registration of each individual file by Agave, which is very slow and often fails due to the large number of files. Third, once the job is completed, the gzipped file is automated uncompressed (on the server side) for feeding into JBrowse. Last, an empty file, maker_output.jbrowse, is generated, and Apache redirects the link of this file to the JBrowse view of the MAKER output folder.

The Manhattan and QQ plots are created using the qqman package (http://cran.r-project.org/web/packages/qqman/). For both EMMAX and MLM-TASSEL apps, p-value output is converted to the format used by qqman. The converted file (manhattan.plot) is again redirected by Apache to the Shiny app for visualization. The job folder name (displayed in the text field) is passed to the Shiny app to allow it to locate the output of the specific job. The interactive multiple testing correction function is built using R’s p.adjust function (https://stat.ethz.ch/R-manual/R-devel/library/stats/html/p.adjust.html). Any adjustments are interactively reflected on both the Manhattan and QQ plots. Nearby genes are retrieved from Gramene (Ware, et al., 2002) through its web service API.

As demonstrated by both use cases, minor modifications to existing apps are needed to improve the performance of the Agave API, build a workflow, or link to interactive visualization tools. It should also be noted that, for each Agave job, a unique folder is created to hold final results. Therefore, the outputs of different MAKER/SNAP jobs can have the same output name, as shown in Figure S2. Because these outputs are organized in different output folders, and the folder name is unique for a specific job.

For outputs, the h5ai directory presents all outputs, but the history panel only displays predefined outputs in the app JSON file, as shown in Figure 1. Such implementation not only speeds up loading a workflow but also ensures that a workflow can be built with the predefined outputs. The former feature is achieved by using a set of synchronized app JSON files on the server and storing the workflow in the MySQL database, eliminating the need to query the remote Agave database for each individual app (form) and job (history) when loading a workflow. The latter feature is critical in order to build reproducible workflows through Agave API, and is implemented by enforcing passing output ID (defined in the app JSON for each predefined output of an Agave app) to the output name (in the wrapper script of the app), because the Agave API does not support passing the IDs of outputs to the wrapper script.


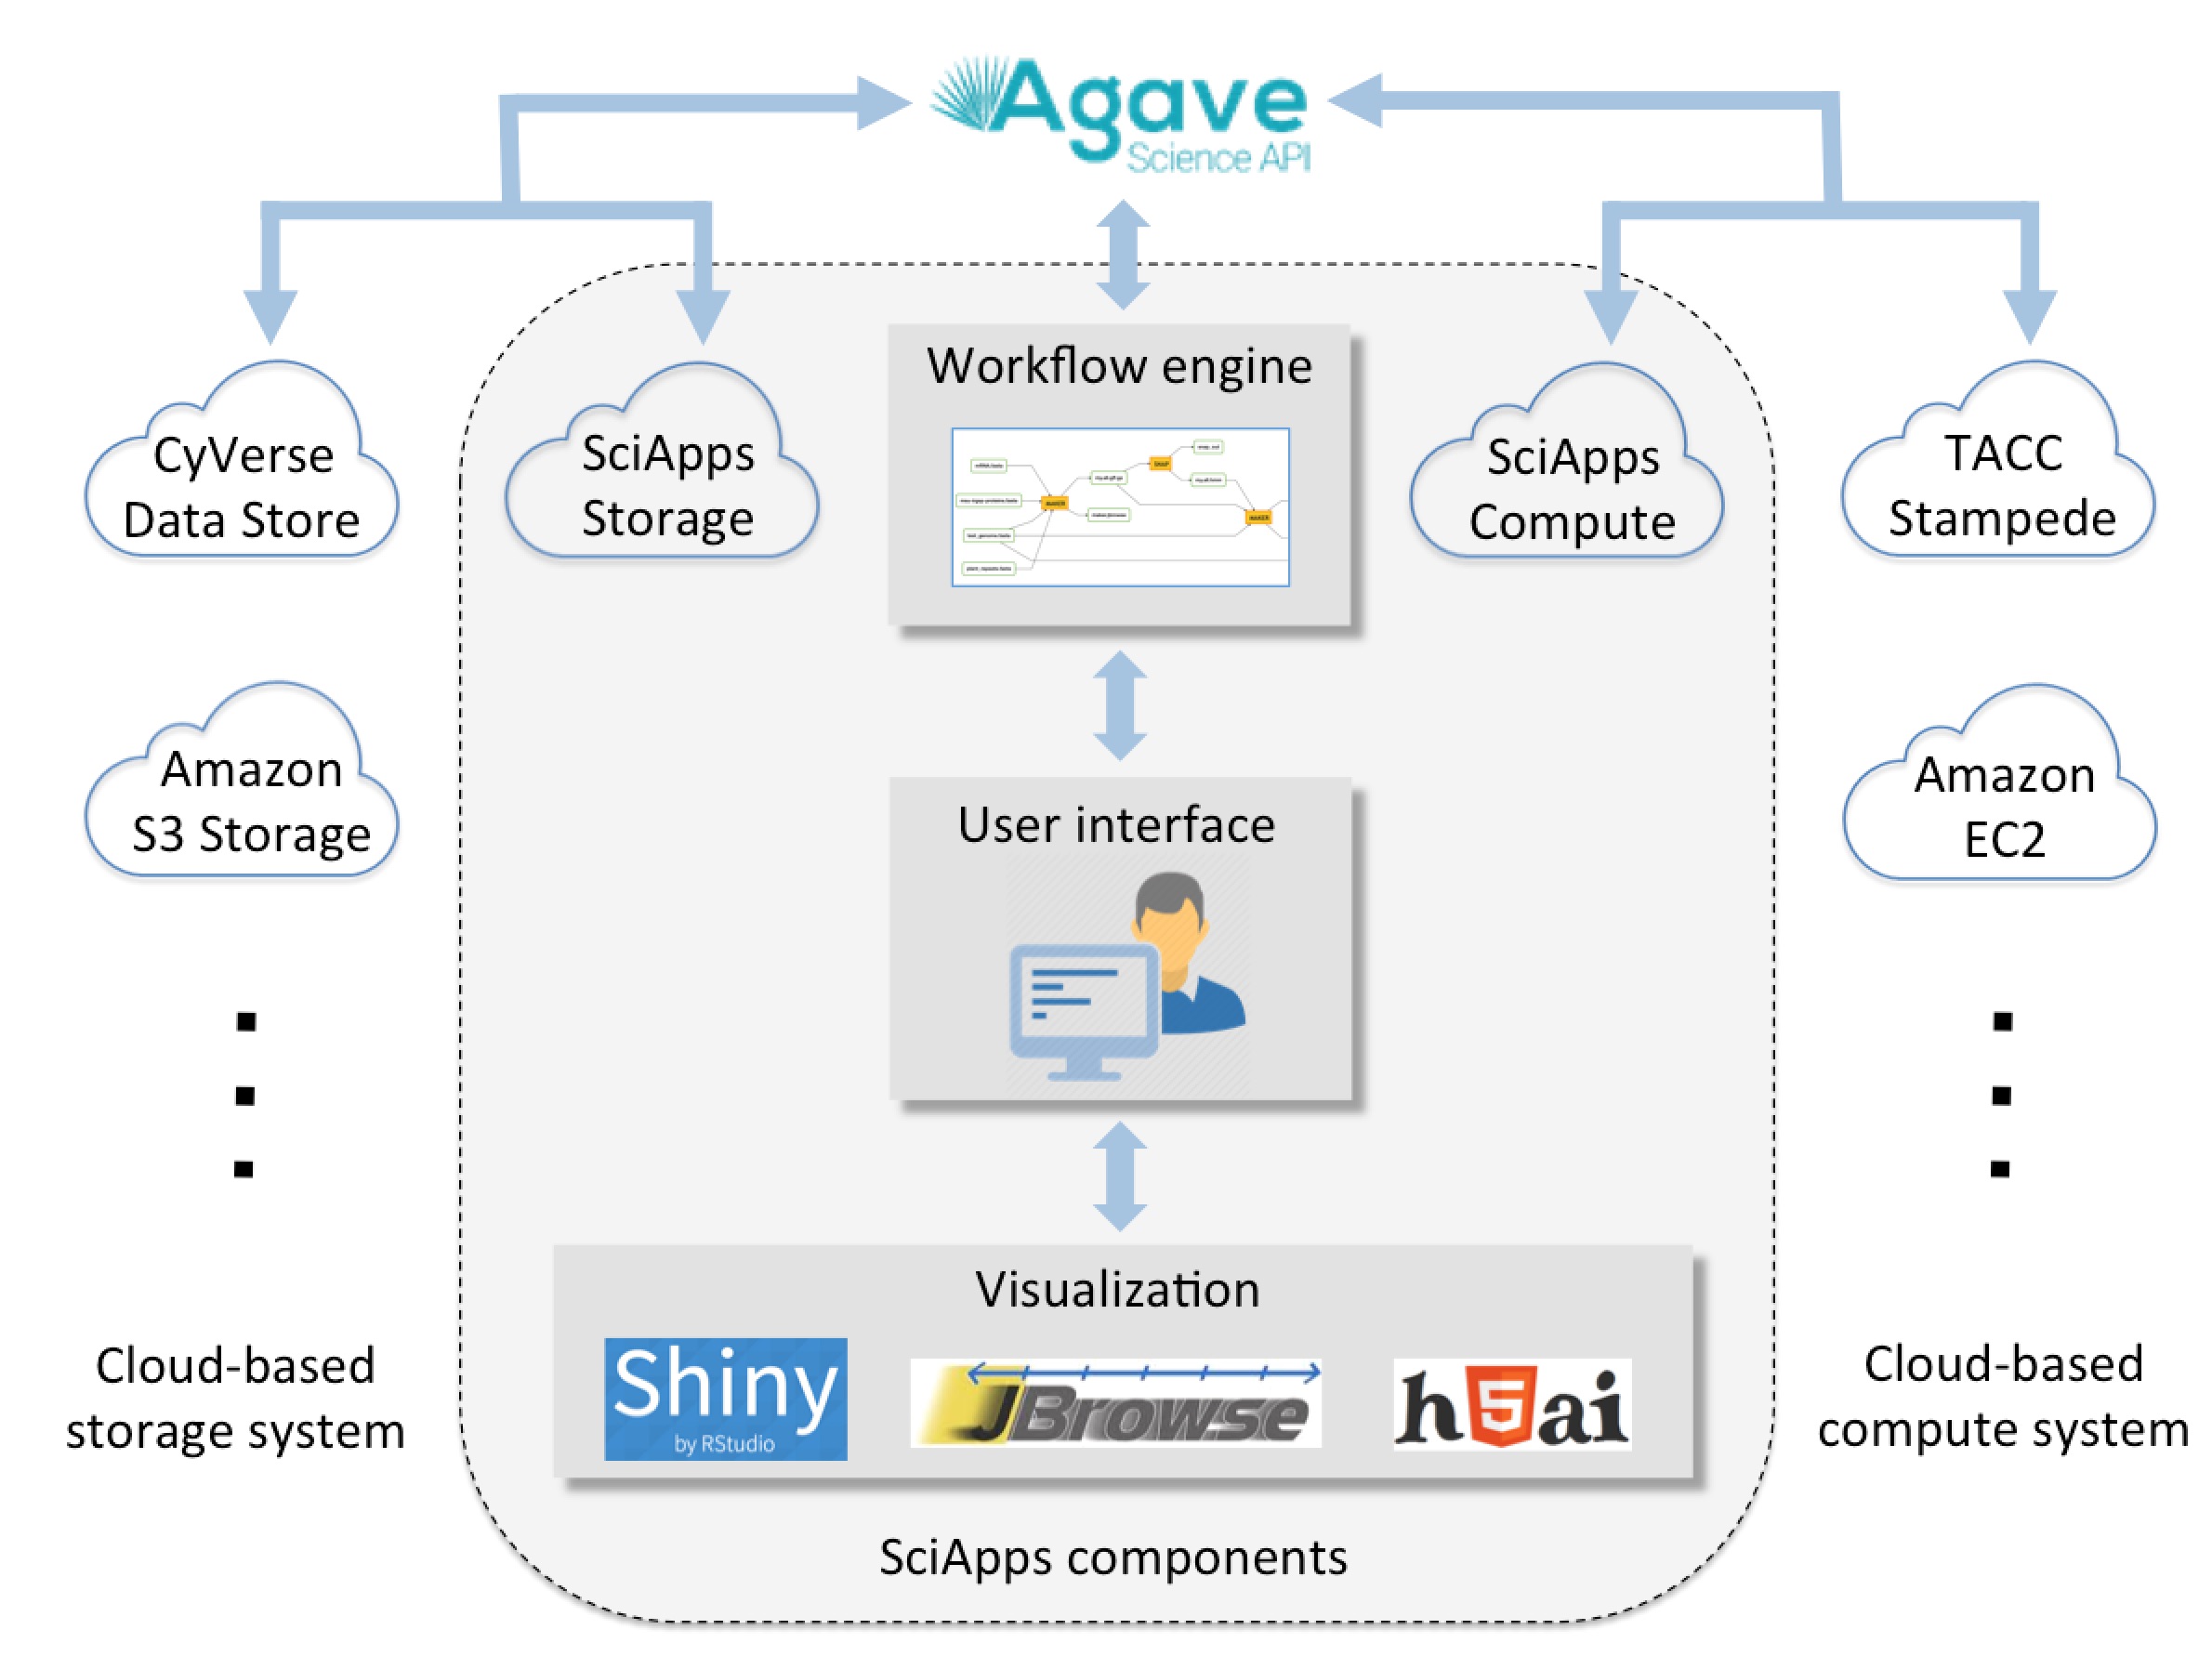


**Fig. 1. SciApps architecture**. The major components of SciApps and their connections to cloud-based systems through the Agave Science API.


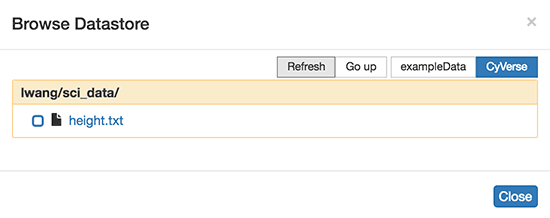


**Fig. S2. Retrieving data from the CyVerse Data Store**. The exampleData tab points to example data used for public workflows. The CyVerse tab points to the user's sci_data folder (login needed) inside the CyVerse Data Store. The SciApps help page illustrates how CyVerse users can bring their data from the CyVerse Data Store to SciApps. Specifically, users need to have a CyVerse account and the SciApps service enabled from the CyVerse user portal. Once enabled, the sci_data folder is automatically created to hold users' data for SciApps.


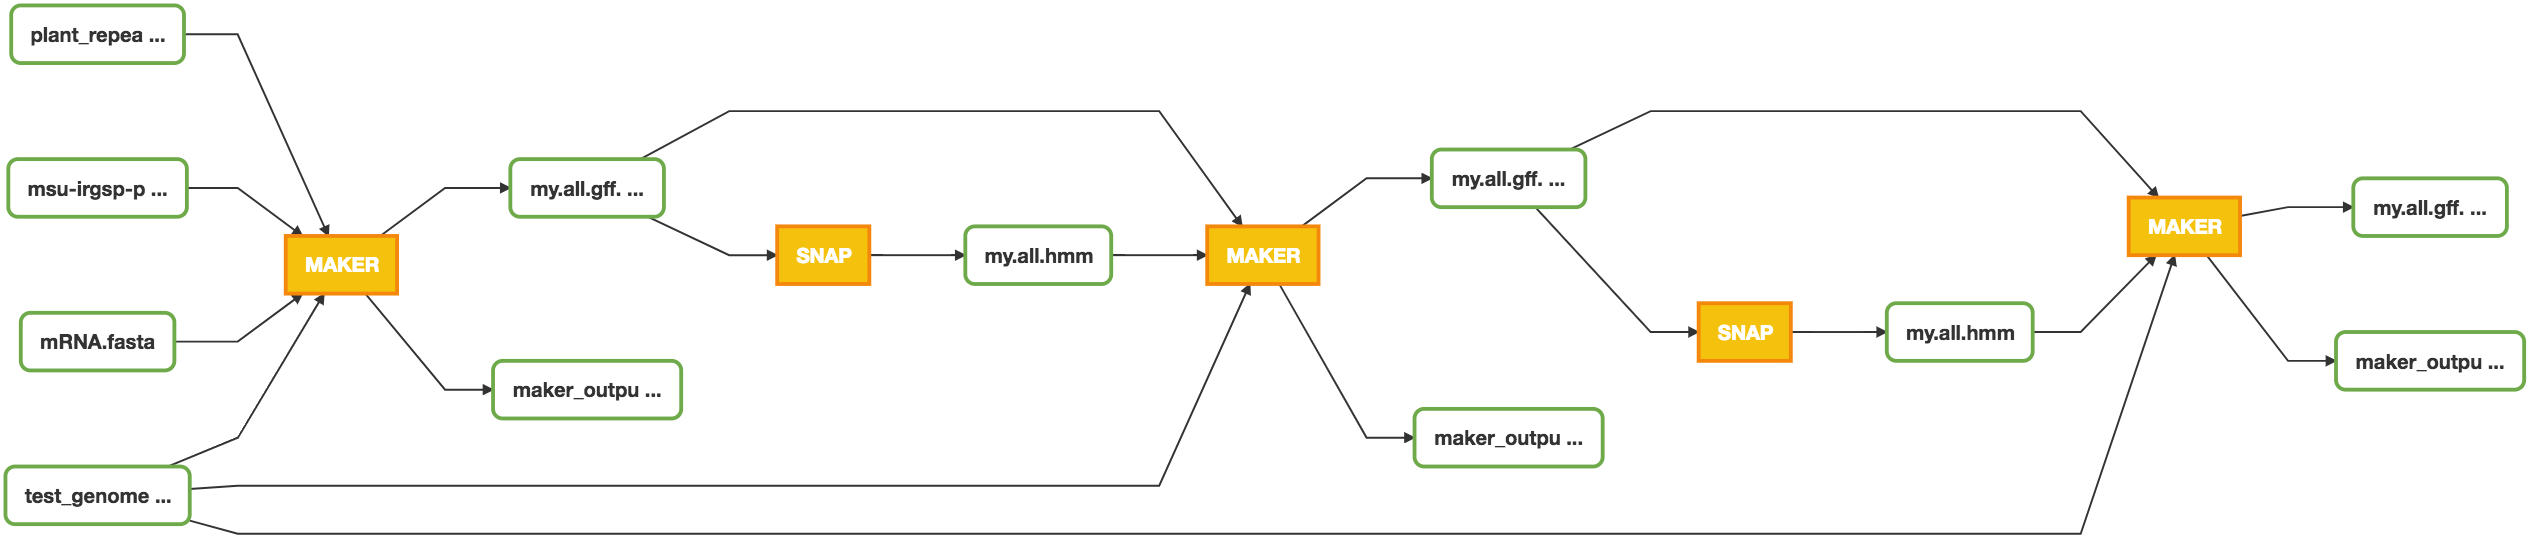


**Fig. S3. Three-pass iterative annotation workflow using MAKER and SNAP**. Data nodes are represented by rounded green rectangles, and app nodes are represented by orange filled rectangles. Arrowheads on the links between data and app nodes show the direction of data flow.


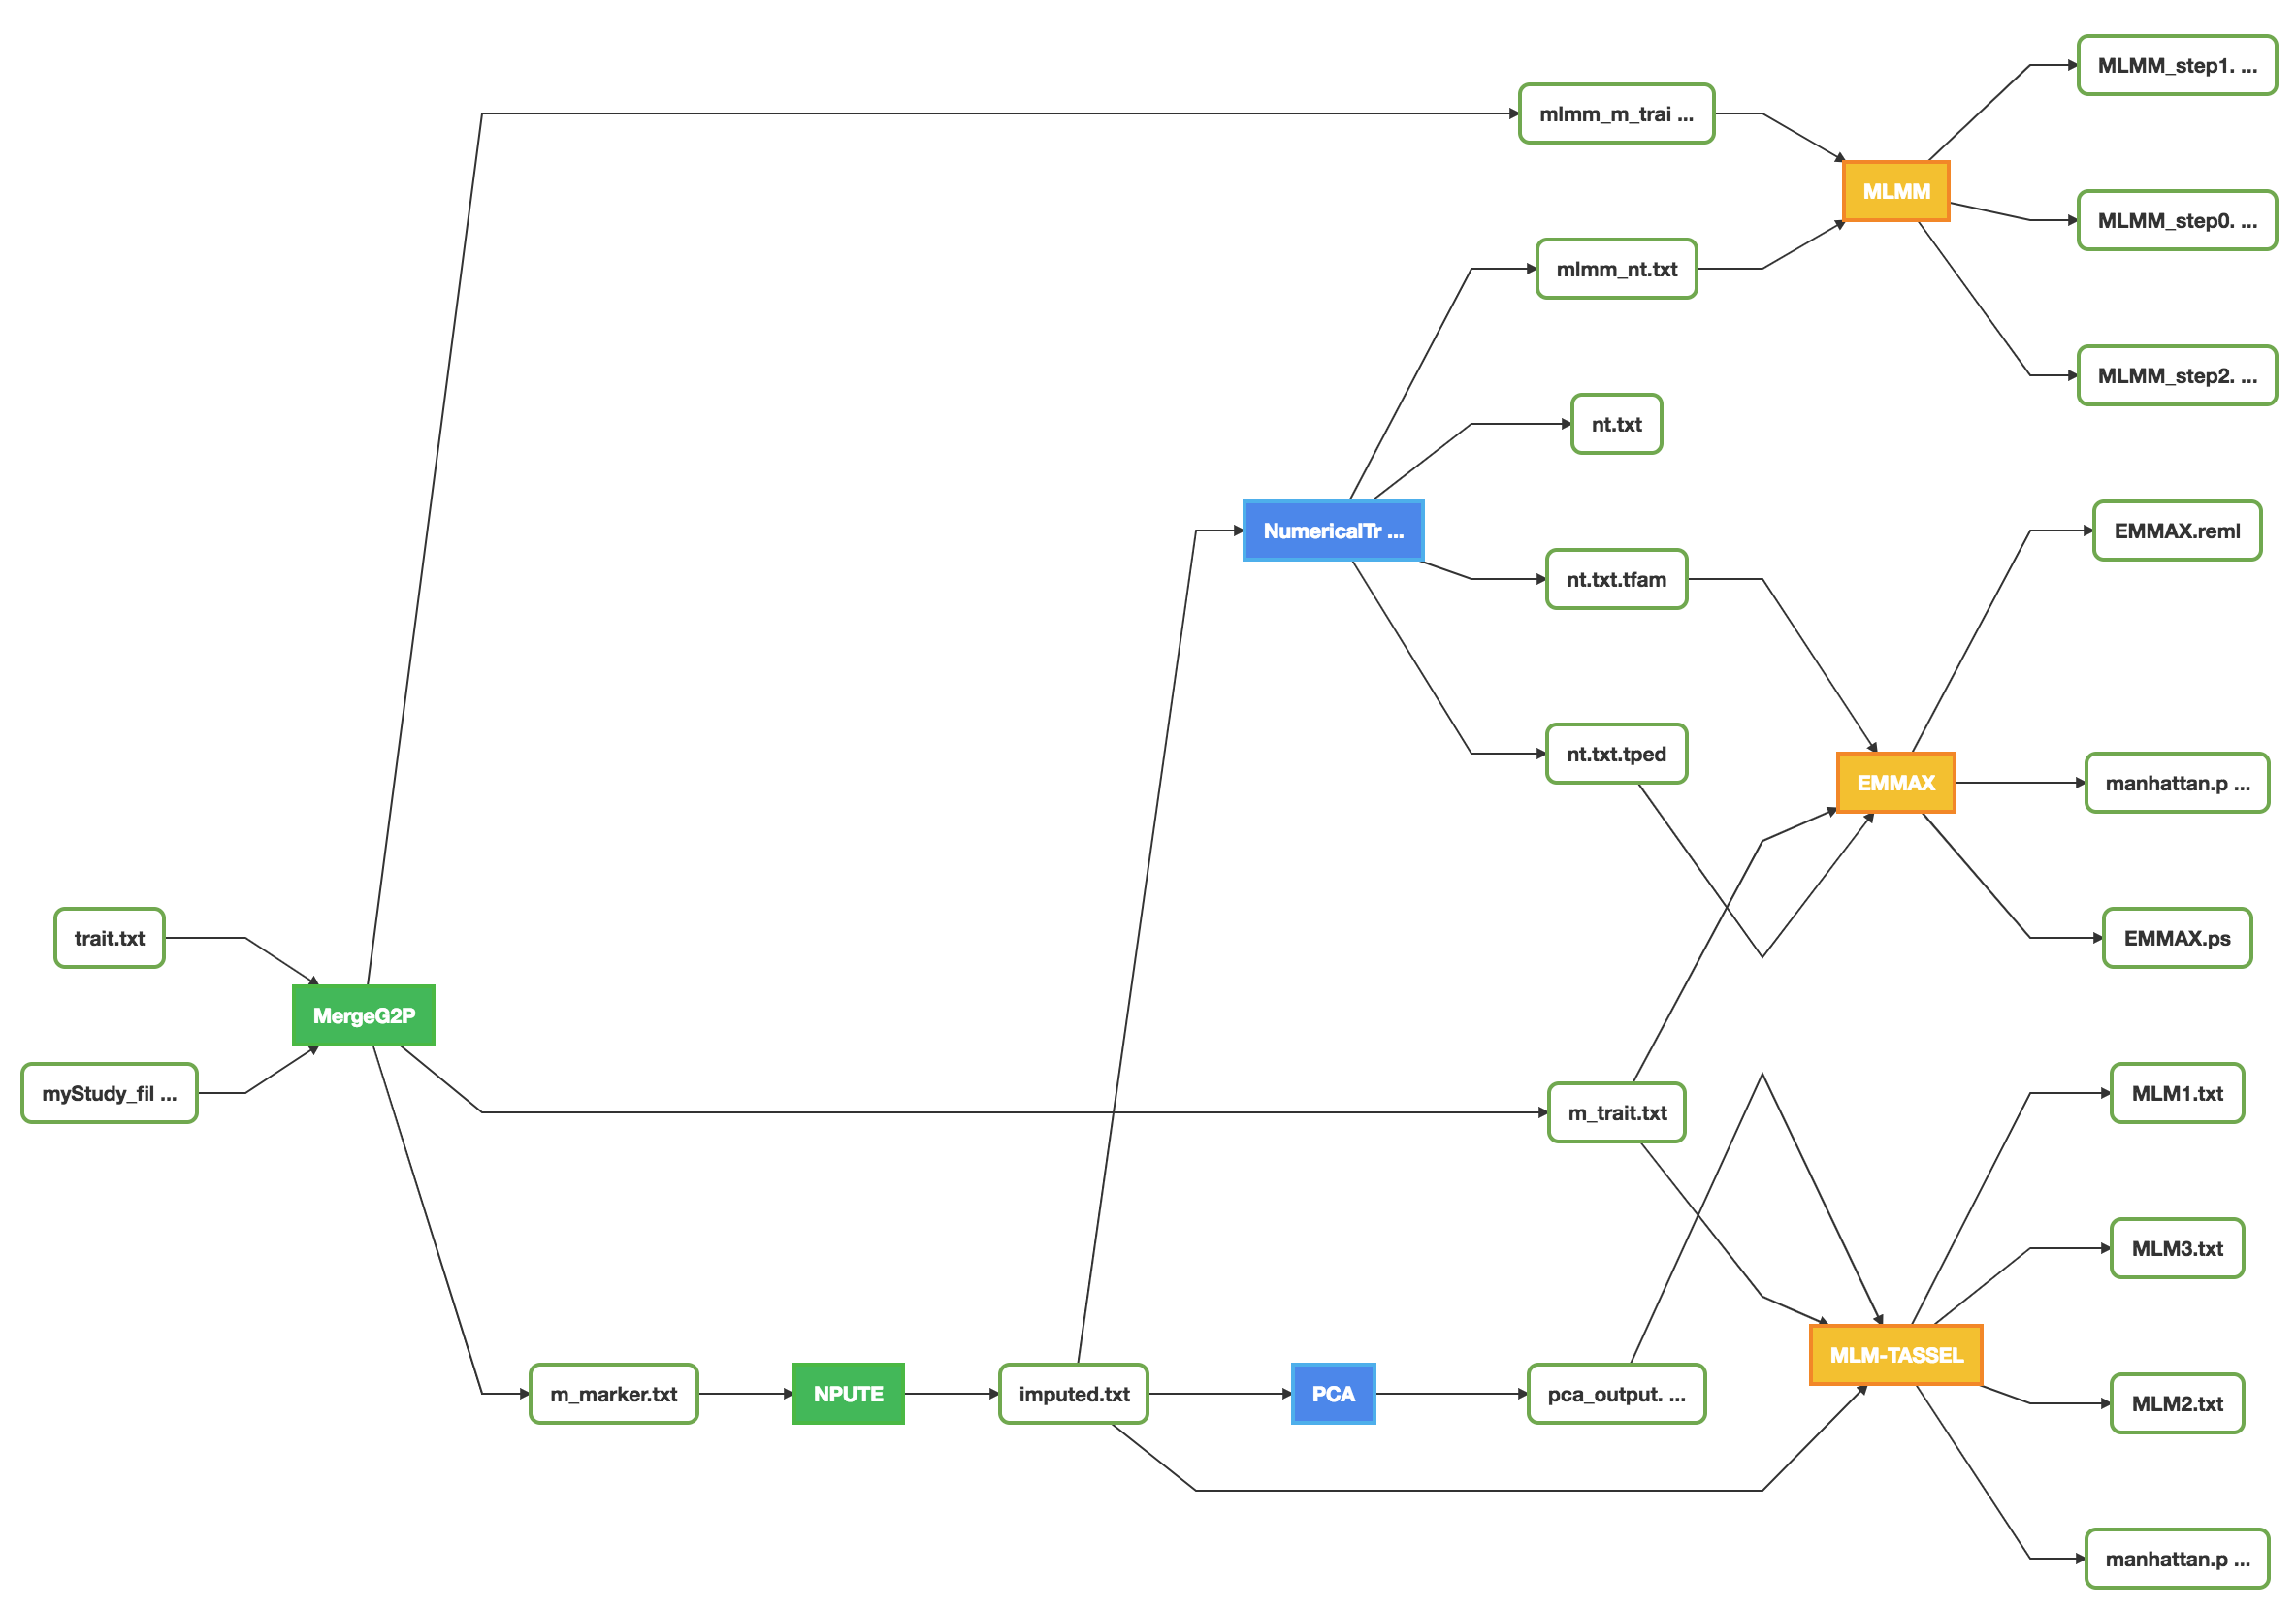


**Fig. S4. Mixed model–based association workflow**. Colors of app nodes represent the statuses of the analysis tasks: pending (yellow), running (blue), completed (green), or failed (red, not shown).


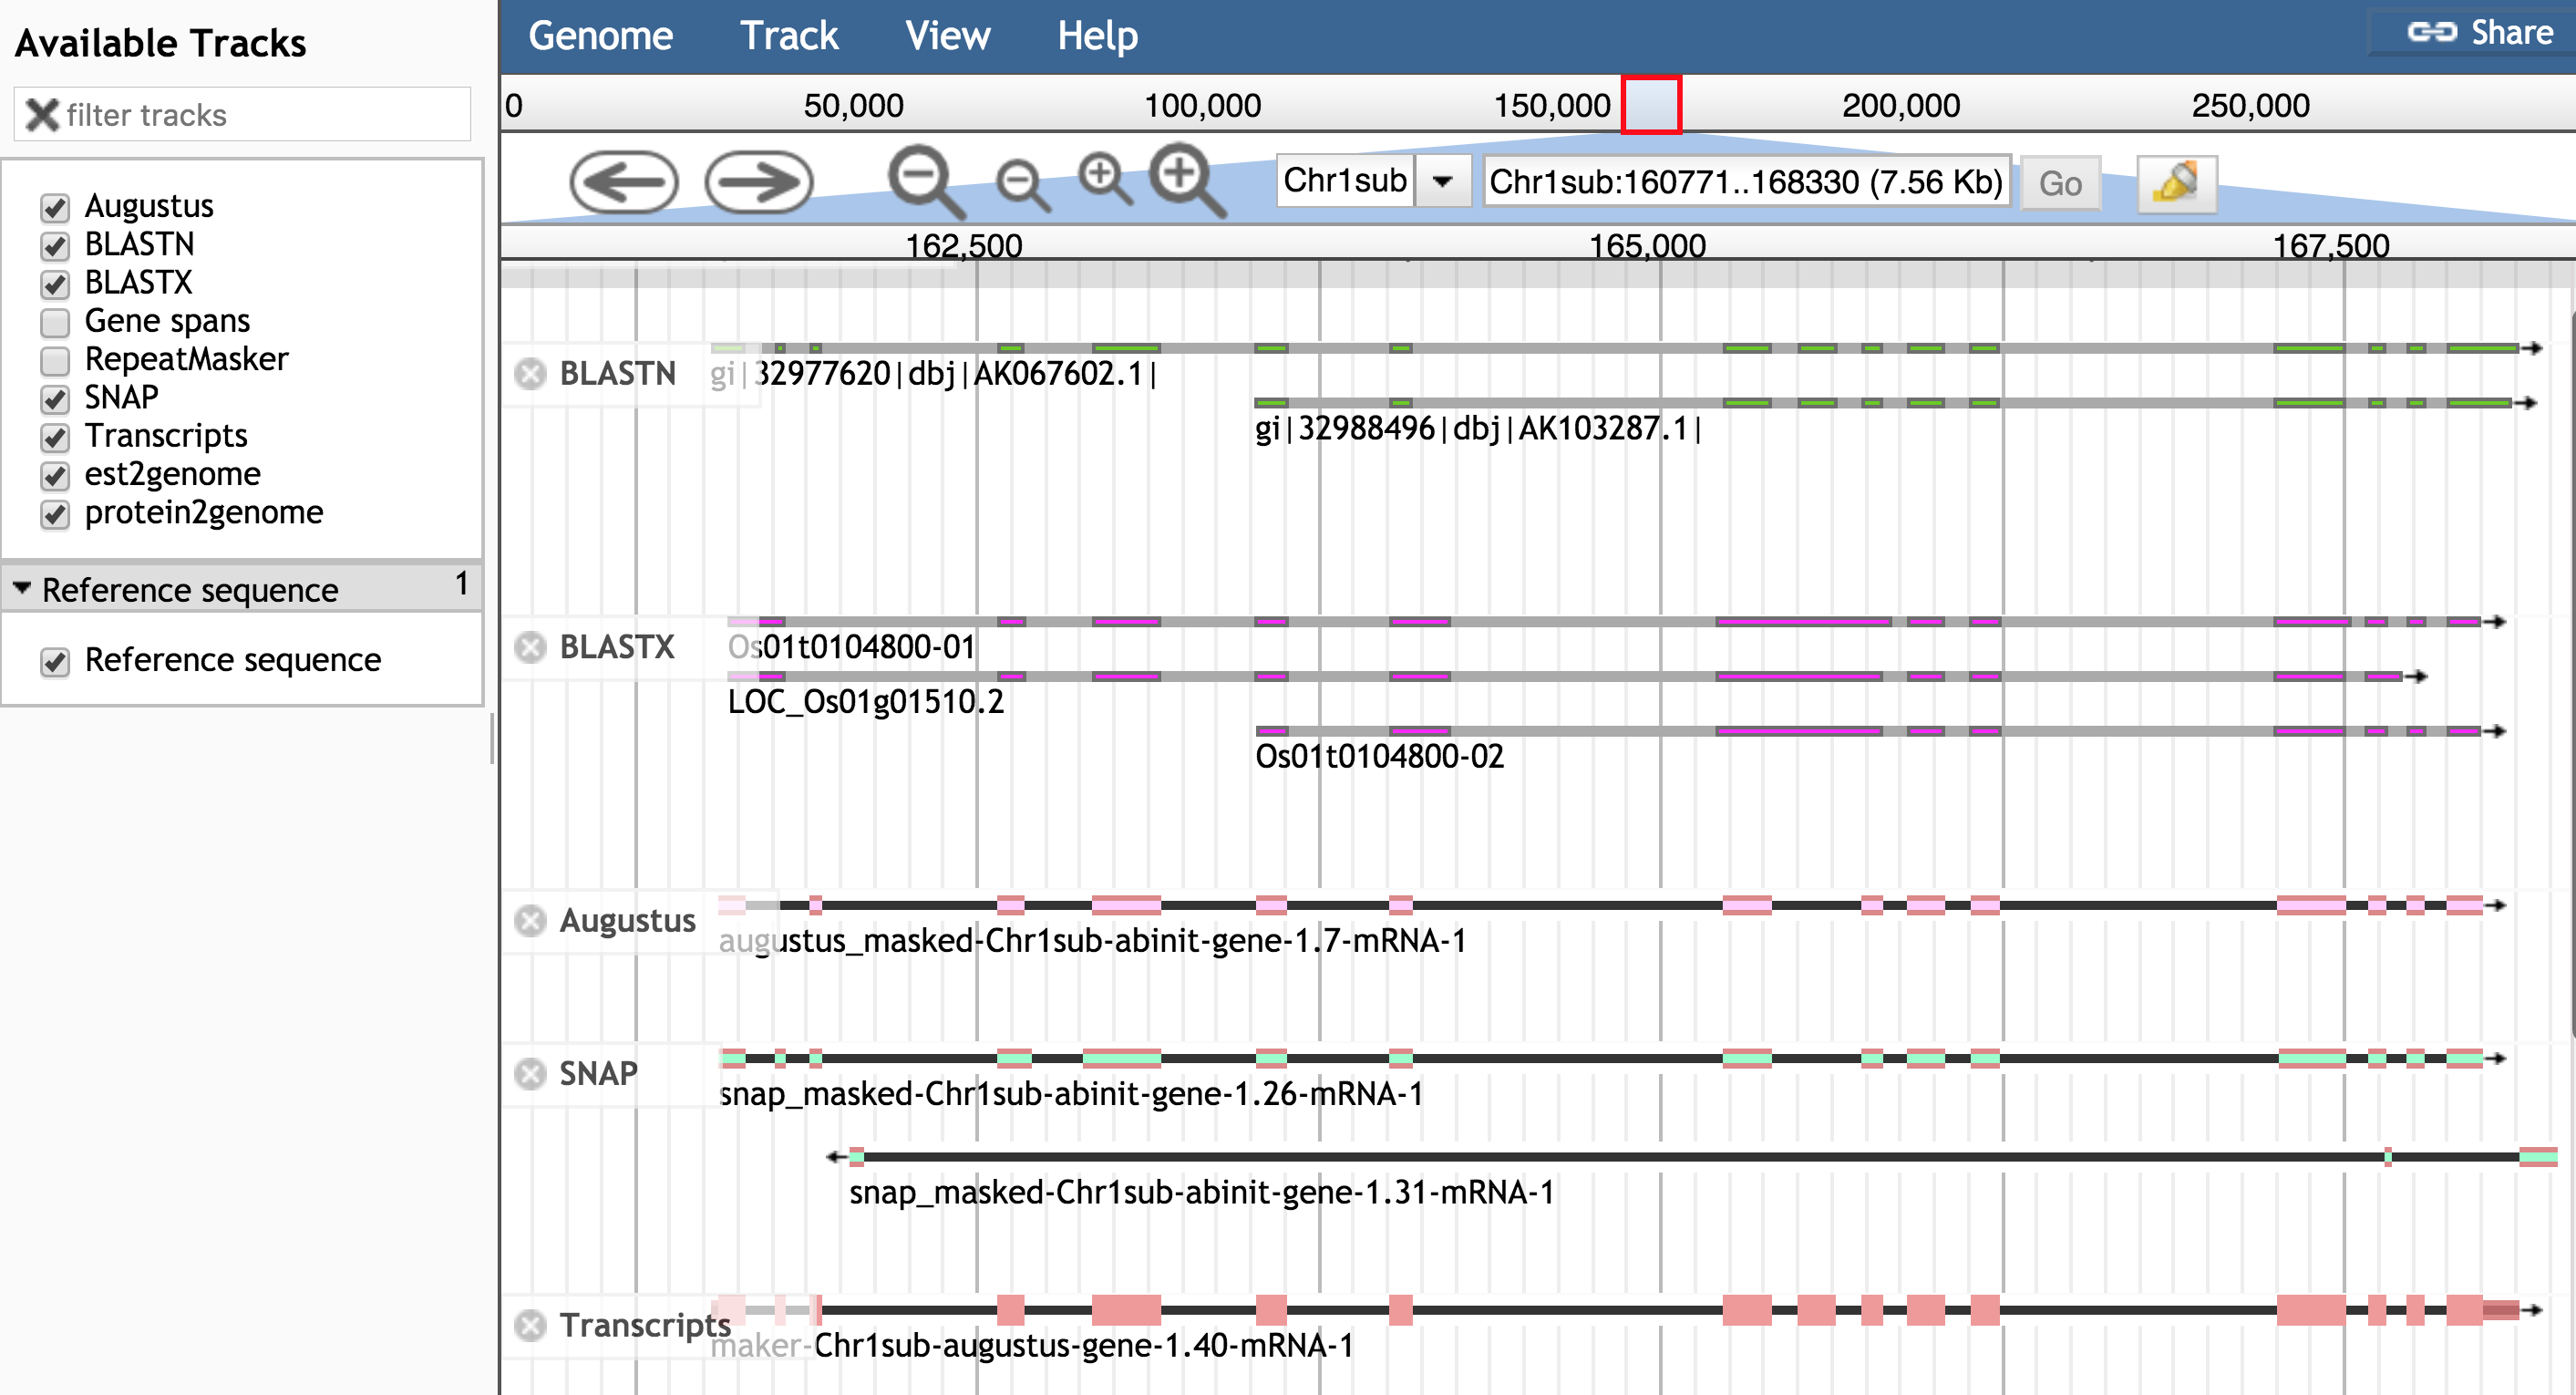


**Fig. S5. JBrowse view of annotation results**. The MAKER annotation is shown as the ‘Transcripts’ track in the bottom of the right panel, with multiple track data used by MAKER displayed above it.


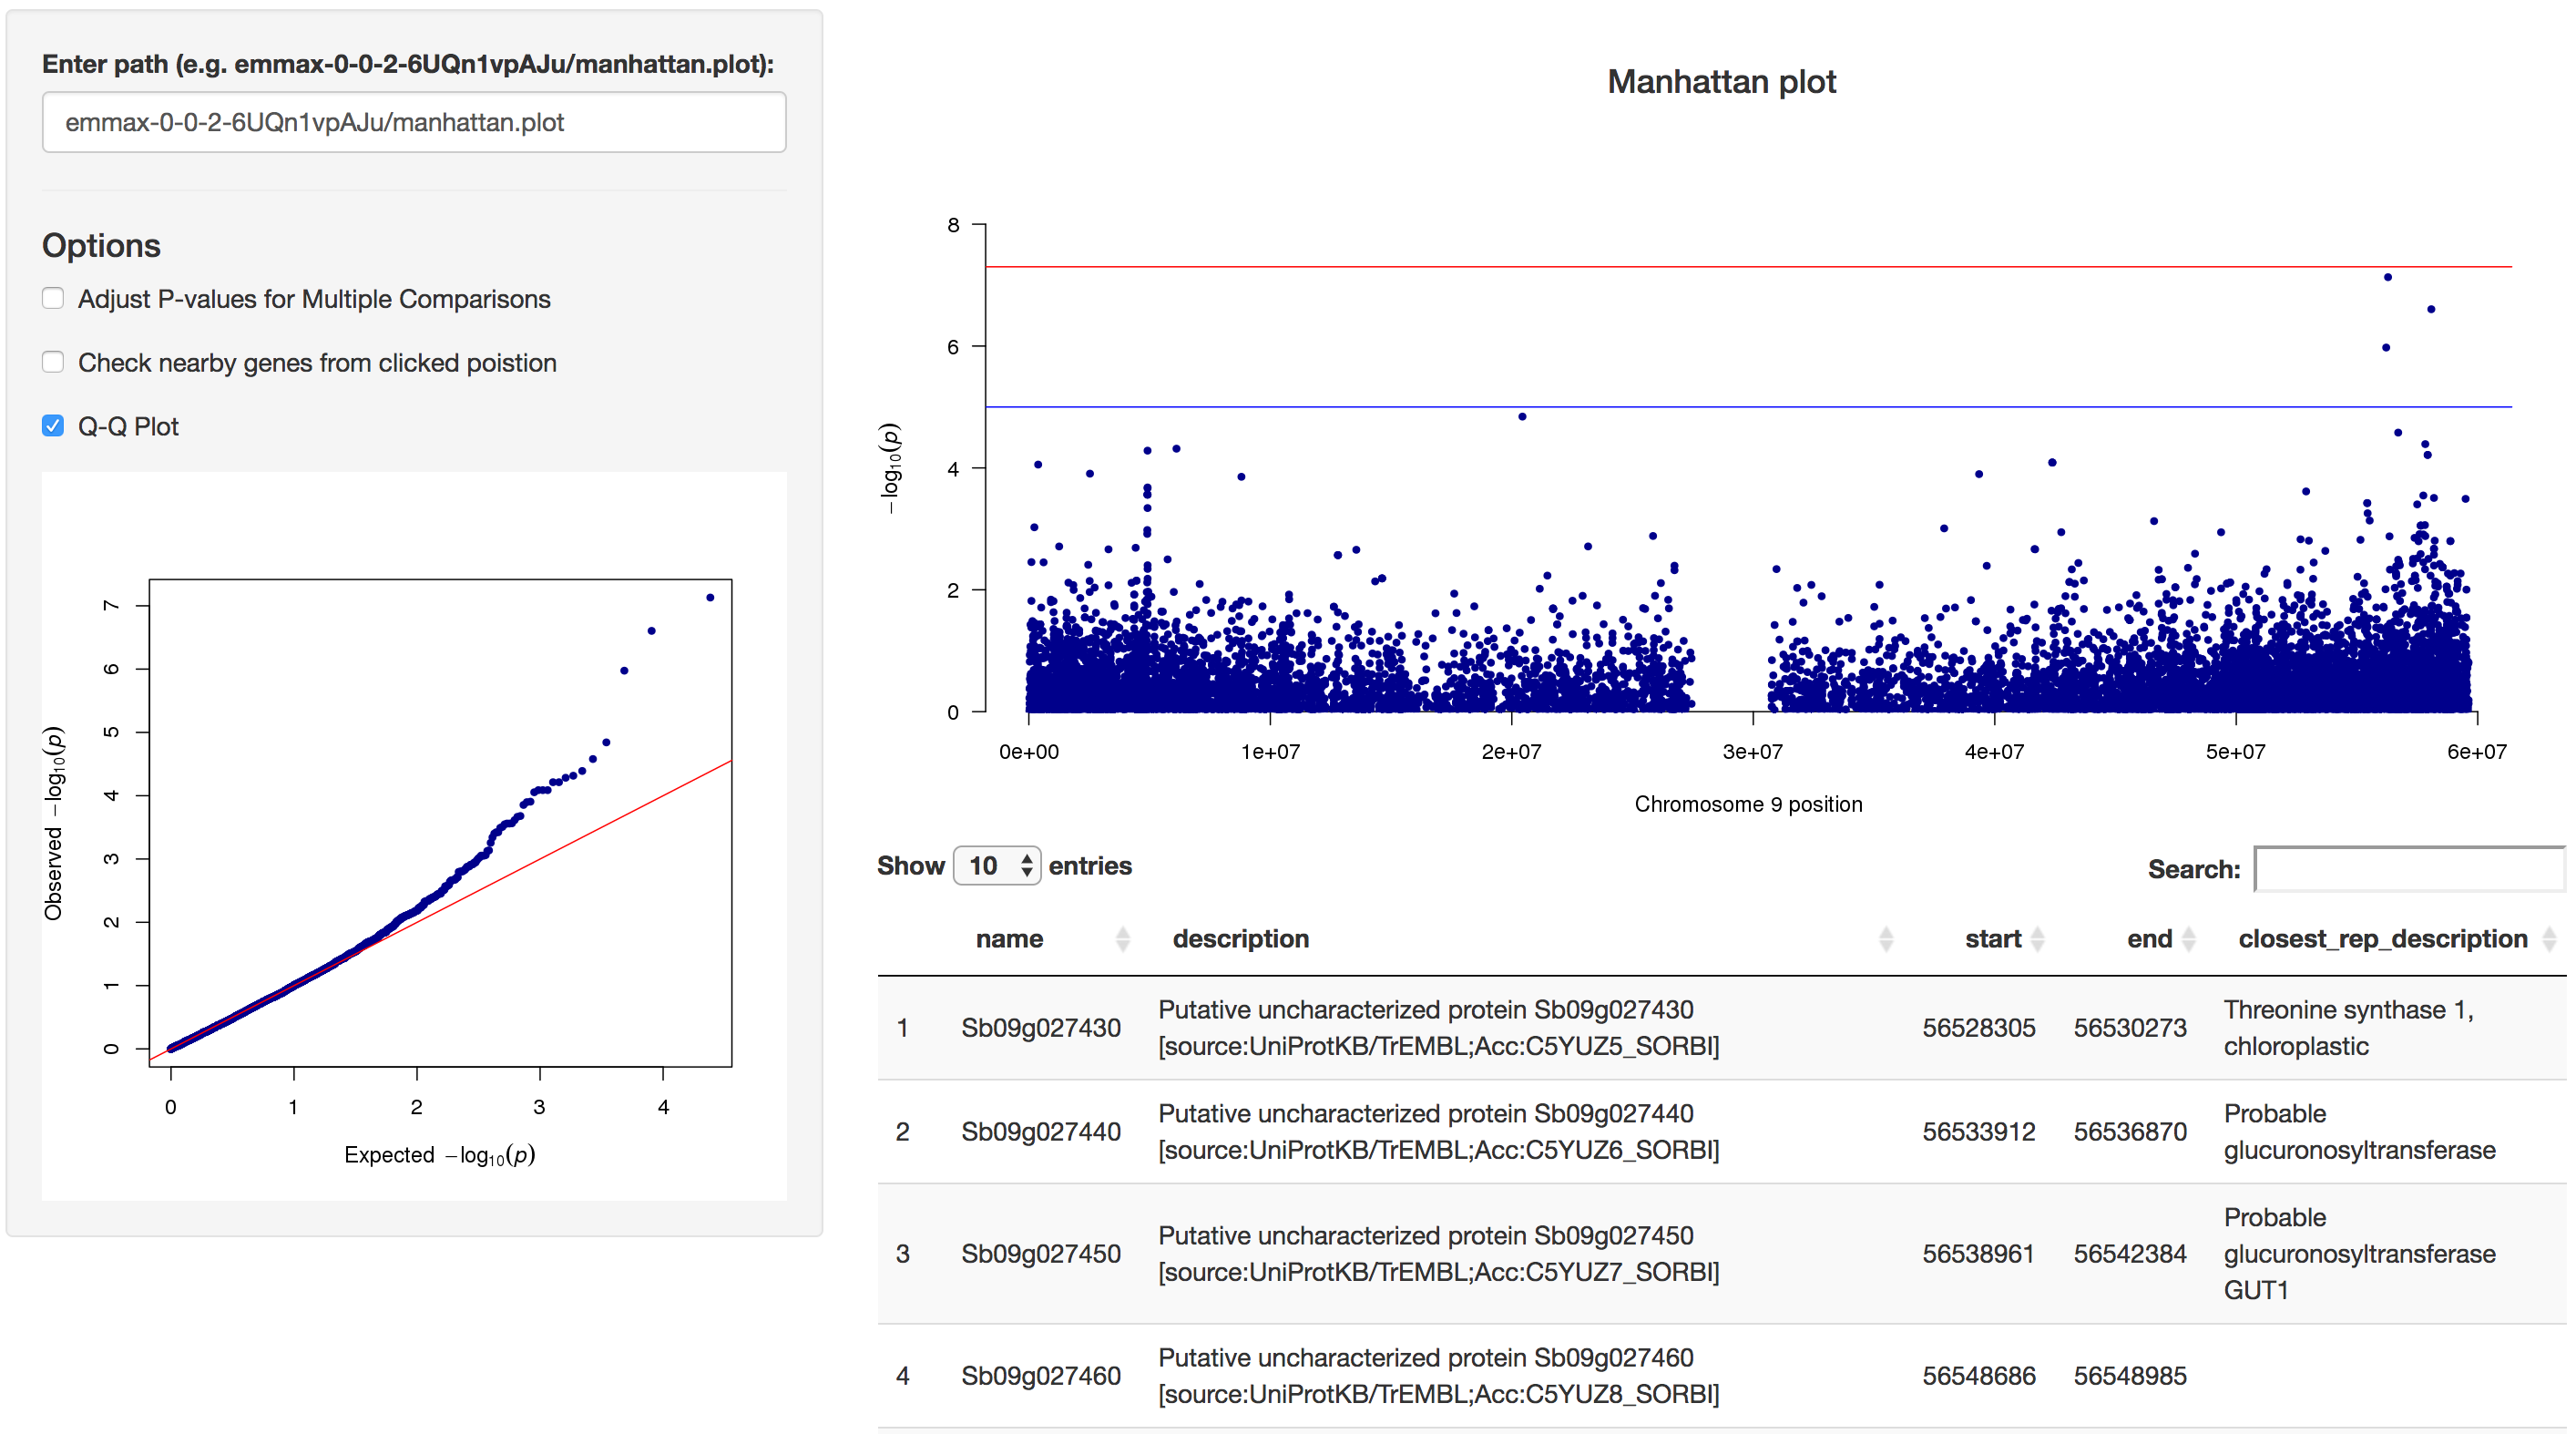


**Fig. S6.** **Interactive visualization of association output from EMMAX.** The Manhattan plot also shows genome-wide significance (solid red line) and suggestive significance (solid blue line; P ≤ 1 × 10−5) from qqman. Genes near the most significant SNP (the one closest to the red solid line) are shown below the Manhattan plot with a window size of 100 kb on each side (only the top four genes are shown). The path (in the top left text field) contains the folder name of the job using EMMAX.

**Fig. S7.** **Comparison of performance between CyVerse Discovery Environment (DE) and SciApps.** The 12 jobs in the Association and Annotation workflows were submitted from DE or SciApps with the same data sets. Total job time (staging inputs, running analysis, and archiving outputs) for each job is normalized against the time needed by DE. Given that each analysis is performed on the same execution system, SciApps outperforms DE by avoiding data transfer between the CyVerse Data Store and the SciApps system, especially when data transfer predominates over computing (e.g. jobs 2, 4, 6, 8, and 11).
